# Supplementary material for: The Effect of Polyhydroxylated Alkaloids on Maltase-Glucoamylase
Source: PubMed Central journal article supplement (PMC3742645; doi:10.1371/journal.pone.0070841), 2013-08-13

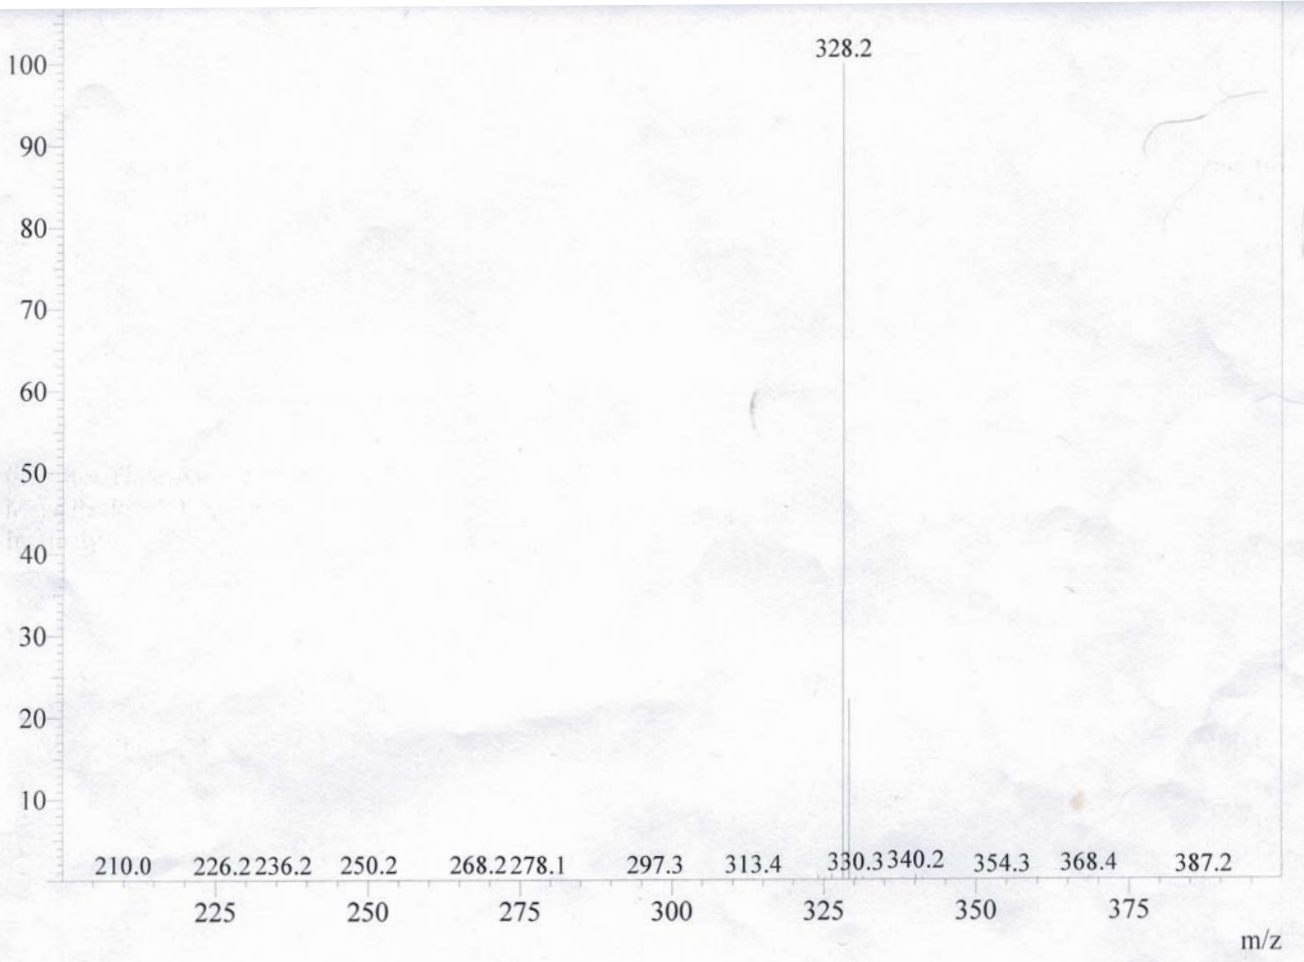

Supplement: pone.0070841.s003.pdf [file pone.0070841.s003.pdf]
