# Supplementary material for: The Effect of Polyhydroxylated Alkaloids on Maltase-Glucoamylase
Source: PubMed Central journal article supplement (PMC3742645; doi:10.1371/journal.pone.0070841), 2013-08-13
Supplement: pone.0070841.s004.pdf [file pone.0070841.s004.pdf]

1H NMR  
TET-5#  
20110615

M1.

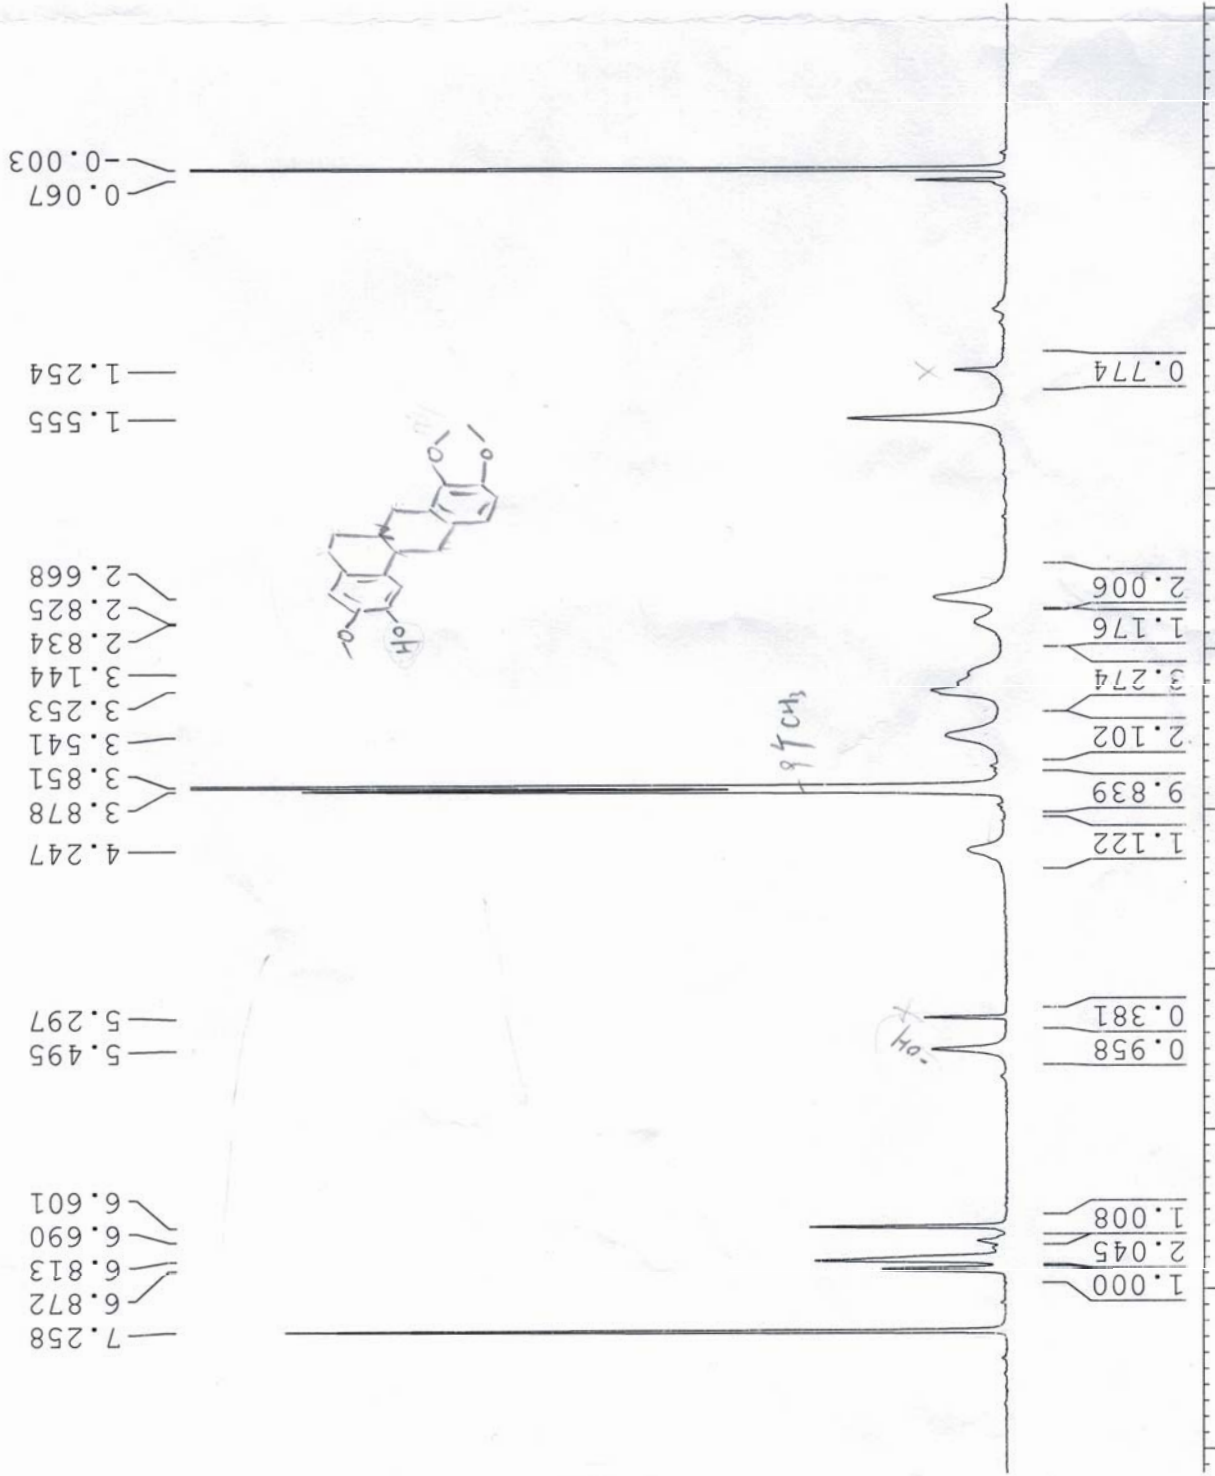

NAME lh05  
EXPNO 125  
PROCNO 1  
Date\_ 20110615  
Time\_ 9.38  
INSTRUM spect  
PROBHD 5 mm BBI 1H-BB  
PULPROG zg30  
TD 32768  
SOLVENT CDC13  
NS 16  
DS 0  
SWH 17985.611 Hz  
FIDRES 0.548877 Hz  
AQ 0.9110282 sec  
RG 812.7  
DE 27.800 usec  
WE 6.50 usec  
TE 298.1 K  
D1 2.00000000 sec  
TDO 1

==== CHANNEL f1 =====  
NUC1 1H  
P1 11.80 usec  
PL1 2.00 dB  
PL1W 15.84893227 W  
SF01 600.1328788 MHz  
SI 32768  
SF 600.1300255 MHz  
WDW EM  
SSB 0  
LB 0.80 Hz  
GB 0  
PC 1.00
