# Supplementary material for: The Effect of Polyhydroxylated Alkaloids on Maltase-Glucoamylase
Source: PubMed Central journal article supplement (PMC3742645; doi:10.1371/journal.pone.0070841), 2013-08-13

7.257  
6.816  
6.791  
6.770  
6.739  
6.719  
6.673  
6.652  
6.593  
5.292  
4.271  
4.232  
4.190  
4.130  
4.112  
3.886  
3.866  
3.857  
3.805  
3.585  
3.546  
3.504  
3.264  
3.257  
3.225  
3.217  
3.202  
3.162  
3.132  
2.876  
2.845  
2.808  
2.692  
2.659  
2.042  
1.931  
1.257  
0.960  
0.942  
0.880  
0.862  
0.121  
0.071  
0.000

Current Data Parameters  
 NAME 1h20110601  
 EXPNO 77  
 PROCNO 1

F2 - Acquisition Parameters  
 Date\_ 20110617  
 Time\_ 15.43  
 INSTRUM spect  
 PROBHD 5 mm PADUL 13C  
 PULPROG zg30  
 TD 32768  
 SOLVENT CDC13  
 NS 16  
 DS 0  
 SWH 12019.230 Hz  
 FIDRES 0.366798 Hz  
 AQ 1.3631988 sec  
 RG 203  
 DW 41.600 usec  
 DE 6.00 usec  
 TE 300.2 K  
 D1 2.00000000 sec  
 TD0 1

==== CHANNEL f1 =====  
 NUC1 1H  
 P1 12.60 usec  
 PL1 -1.00 dB  
 SFO1 400.1320007 MHz

F2 - Processing parameters  
 SI 32768  
 SF 400.1300126 MHz  
 EM 0  
 SSB 0  
 LB 0.80 Hz  
 GB 0  
 PC 1.00

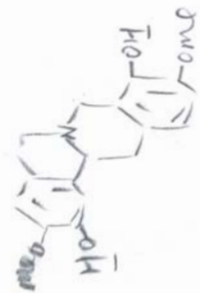

CH<sub>3</sub>

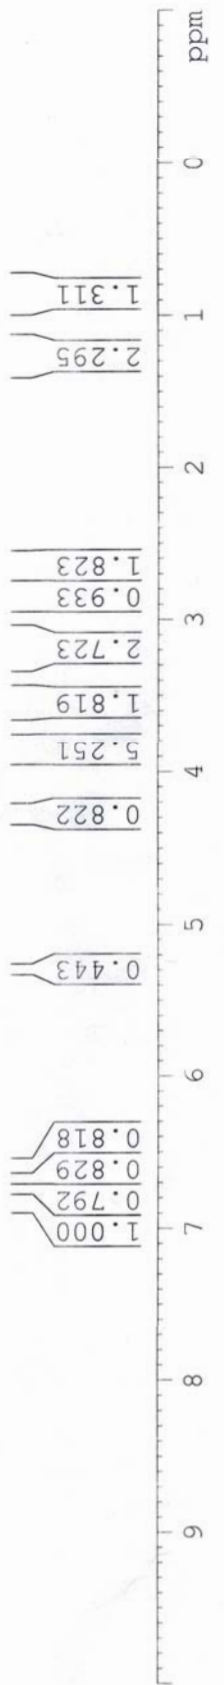

Supplement: pone.0070841.s005.pdf [file pone.0070841.s005.pdf]
